# Supplementary material for: Helmet CPAP to Treat Acute Hypoxemic Respiratory Failure in Patients with COVID-19: A Management Strategy Proposal
Source: J Clin Med. 2020 Apr 22;9(4):1191. doi: 10.3390/jcm9041191 (PMC7230457; doi:10.3390/jcm9041191)
Supplement: Supplementary file 1 [file jcm-09-01191-s001.pdf]

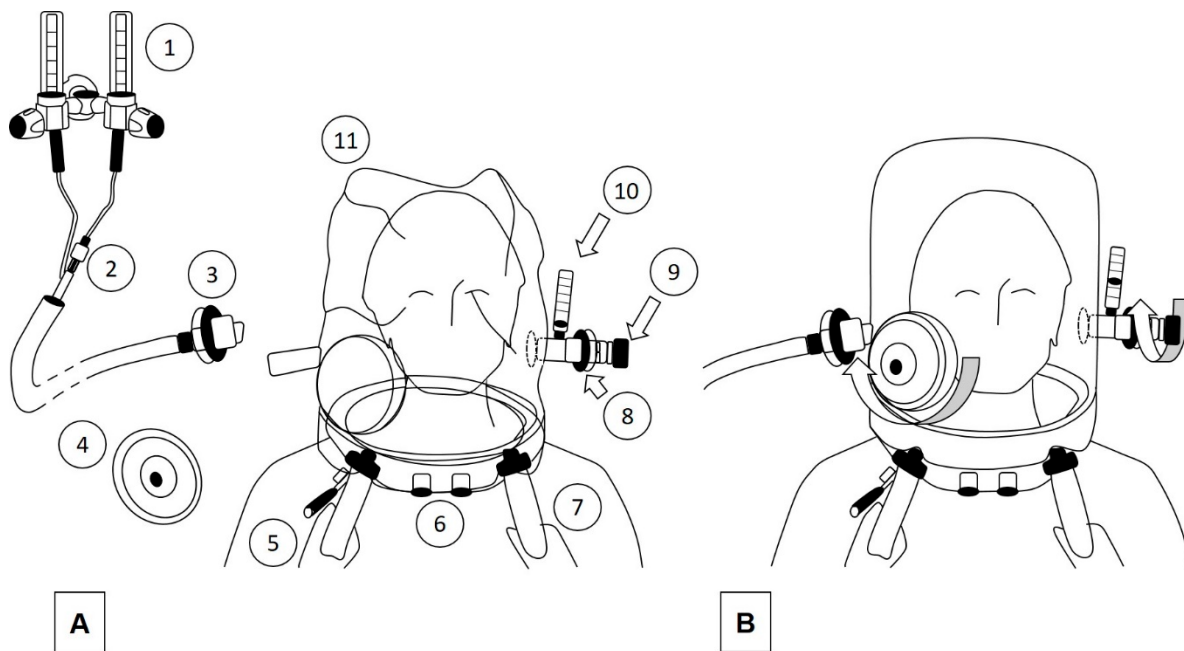

**Figure S1.** Schematic representation of the helmet CPAP equipment. (A) shows the mounted deflated helmet just before being connected to the high flow oxygen circuit. When connected to gas flow (B) the antisuffocation valve must be in place and the helmet must remain inflated during inspiratory efforts. 1 = double oxygen flow meter (maximal flows of 5 and 30 L, respectively). The right combination of flows to obtain the desired  $\text{FiO}_2$  depending on the PEEP setting is usually reported in a leaflet and depends on the available high-flow mechanism (e.g., air + oxygen blender). 2 = venturimeter valve must be closed to obtain 100%  $\text{FiO}_2$ . 3 = anti-bacterial filter. 4 = antisuffocation valve (compare with (B); valve in place. The curved arrow indicates a screw like mechanism); 5 = inflatable air pillow that runs around patients' neck for improved comfort and air seal; 6 = small additional operational ports to allow the passage of the nasal gastric tube or for maintaining the seal and reduce contamination while the patient drinks by means of a straw; 7 = armpit straps for anchoring the helmet; 8 = 100% anti-viral and anti-bacterial filter; 9 = PEEP valve, which can be regulated with a spring mechanism (see also the curved arrow in (B)); 10 = manometer column, to have a direct reading of the real-time pressure changes inside the helmet; depending on the helmet design, it can be replaced by spot reading by means of a hand-held manometer through a small port usually placed on the filter crown; 11 = plastic hood (deflated). CPAP = continuous positive airway pressure;  $\text{FiO}_2$  = inspired oxygen fraction; PEEP = positive end-expiratory pressure.

**Table S1.** COVID-19 patients' severity and in-hospital mortality rate for studies published until 8 April 2020.

| Region                                                                          | Setting       | Median (IQR) P/F <sup>#</sup>                                    | Respiratory Support                      | In-Hospital Mortality       |
|---------------------------------------------------------------------------------|---------------|------------------------------------------------------------------|------------------------------------------|-----------------------------|
| 30 provinces, China [21]                                                        | ICU and other | 225 (158–293) * severe patients                                  | 46.9% MV (32.4% NIV–14.5% IMV)           | 8.1%                        |
|                                                                                 |               | 165 (120–304) * composite outcome **                             | 80.6% MV (43.3% NIV–37.3% IMV)           | 22.4%                       |
| Wuhan, China [33]                                                               | ICU and other | 54% of patients with P/F ≤ 300<br>31% of patients with P/F ≤ 200 | 21% HFNC; 31% MV (14% NIMV–17% IMV)      | 28.3% (80.7% <sup>†</sup> ) |
| Wuhan, China [34]                                                               | ICU and other | 76% of patients with P/F ≤ 300                                   | 20% MV (12.3% NIV–7.7% IMV)              | 18%                         |
| Wuhan, China [35]                                                               | ICU           | 198 (147–255)                                                    | 30.1% HFNC; 30.2% MV (11% NIV–19.2% IMV) | 28.8%                       |
| Wuhan, China [36]                                                               | ICU           | 279 (157–328)                                                    | 10.2% HFNC; 40% MV (9.9% NIV–29.1% IMV)  | 38.7%                       |
| Lombardy, Italy [37]                                                            | ICU           | 160 (114–220)                                                    | 99% MV (11% NIV–88% IMV)                 | 26%                         |
| Seattle area, WA (US) [38]                                                      | ICU           | 142 (94–177) <sup>‡</sup>                                        | 100% IMV                                 | 50%                         |
| Division of Respiratory Diseases, “L. Sacco” University Hospital, Milano, Italy | RICU          | 138 (87–267)                                                     | 73% Helmet CPAP                          | 24%                         |

ICU = intensive care unit; RICU = respiratory intermediate care unit; P/F = PaO<sub>2</sub>/FiO<sub>2</sub> ratio; IQR = inter quartile range; MV = mechanical ventilation; IMV = invasive mechanical ventilation; NIV = non-invasive mechanical ventilation; HFNC = high flow nasal cannula; CPAP = continuous positive airway pressure. The study by Cao et al. [39] was excluded from the present report because among the 58 patients with ARDS none was deceased at the time of the publication. <sup>#</sup> when available; \* missing for 81,3% of patients. Converted in mmHg from kPa; \*\* including death, ICU or need for invasive mechanical ventilation; <sup>†</sup> among patients with respiratory failure; <sup>‡</sup> at day 1 of mechanical ventilation.
